# Supplementary material
Source: PubMed Central journal article supplement (PMC3075061)
Supplement: NIHMS279404-supplement-01.pdf [file NIHMS279404-supplement-01.pdf]

## Supplemental Digital Content 1

### Survey of near work and outdoor activity completed by parent/guardian at each visit

How often does this child read for pleasure (outside of school)? (Check one box.)

1  Never   2  Rarely   3  Sometimes   4  Often   5  Child doesn't read yet.

During the school year, how many **hours per week** (outside of regular school hours) would you estimate this child: (Please fill in every blank; use a zero to indicate no hours.)

---

|                                                                             |           |
|-----------------------------------------------------------------------------|-----------|
| Studies or reads for school assignments                                     | _____ hrs |
| Reads for pleasure                                                          | _____ hrs |
| Watches television                                                          | _____ hrs |
| Uses a computer                                                             | _____ hrs |
| Plays video games (e.g., Gamecube, Xbox, PlayStation, Nintendo, etc.)       | _____ hrs |
| Plays handheld electronic games (e.g., Portable Playstation, Gameboy, etc.) | _____ hrs |
| Engages in outdoor activities (e.g., playing outside, playing sports, etc.) | _____ hrs |
